# Supplementary material for: New Chromones from a Marine-Derived Fungus, Arthrinium sp., and Their Biological Activity
Source: Molecules. 2018 Aug 9;23(8):1982. doi: 10.3390/molecules23081982 (PMC6222336; doi:10.3390/molecules23081982)
Supplement: Supplementary file 1 [file molecules-23-01982-s001.pdf]

## Supplementary Information for

### New Chromones from a Marine-derived Fungus, *Arthrinium* sp.

Jie Bao <sup>1,2</sup>, Fei He <sup>1</sup>, Jin-Hai Yu <sup>1</sup>, Huijuan Zhai <sup>1</sup>, Zhi-Qiang Cheng <sup>1</sup>, Cheng-Shi Jiang <sup>1</sup>, Yuying Zhang <sup>1</sup>, Yun Zhang <sup>3</sup>, Xiaoyong Zhang <sup>4</sup>, Guangying Chen <sup>2,\*</sup> and Hua Zhang <sup>1,\*</sup>

<sup>1</sup> School of Biological Science and Technology, University of Jinan, 336 West Road of Nan Xinzhuang, Jinan 250022, China

<sup>2</sup> Key Laboratory of Tropical Medicinal Plant Chemistry of Ministry of Education, Hainan Normal University, 99 South Road of Longkun Road, Haikou 571158, China

<sup>3</sup> Key Laboratory of Tropical Marine Bio-Resources and Ecology, South China Sea Institute of Oceanology, Chinese Academy of Sciences, 164 West Xingang Road, Guangzhou 510301, China; zhangyun@scsio.ac.cn

<sup>4</sup> College of Marine Sciences, South China Agricultural University, 483 Wushan Road, Guangzhou 510642, China

\* Correspondence: bio\_zhangh@ujn.edu.cn; Tel.: +86-531-8973-6199  
chgying123@163.com; Tel.: +86-898-65889422

#### List of supplementary information

|                                                                                                                             |            |
|-----------------------------------------------------------------------------------------------------------------------------|------------|
| <b>Figure S1.</b> The <sup>1</sup> H-NMR spectrum of arthone A ( <b>1</b> ) in DMSO- <i>d</i> <sub>6</sub>                  | <b>P3</b>  |
| <b>Figure S2.</b> The <sup>13</sup> C-NMR spectrum of arthone A ( <b>1</b> ) in DMSO- <i>d</i> <sub>6</sub>                 | <b>P3</b>  |
| <b>Figure S3.</b> The HSQC spectrum of arthone A ( <b>1</b> ) in DMSO- <i>d</i> <sub>6</sub>                                | <b>P4</b>  |
| <b>Figure S4.</b> The HMBC spectrum of arthone A ( <b>1</b> ) in DMSO- <i>d</i> <sub>6</sub>                                | <b>P4</b>  |
| <b>Figure S5.</b> The (–)-HR-ESIMS spectrum of arthone A ( <b>1</b> )                                                       | <b>P5</b>  |
| <b>Figure S6.</b> The <sup>1</sup> H-NMR spectrum of arthone B ( <b>2</b> ) in DMSO- <i>d</i> <sub>6</sub>                  | <b>P5</b>  |
| <b>Figure S7.</b> The <sup>13</sup> C-NMR spectrum of arthone B ( <b>2</b> ) in DMSO- <i>d</i> <sub>6</sub>                 | <b>P6</b>  |
| <b>Figure S8.</b> The HSQC spectrum of arthone B ( <b>2</b> ) in DMSO- <i>d</i> <sub>6</sub>                                | <b>P6</b>  |
| <b>Figure S9.</b> The <sup>1</sup> H- <sup>1</sup> H COSY spectrum of arthone B ( <b>2</b> ) in DMSO- <i>d</i> <sub>6</sub> | <b>P7</b>  |
| <b>Figure S10.</b> The HMBC spectrum of arthone B ( <b>2</b> ) in DMSO- <i>d</i> <sub>6</sub>                               | <b>P7</b>  |
| <b>Figure S11.</b> The (+)-HR-ESIMS spectrum of arthone B ( <b>2</b> )                                                      | <b>P8</b>  |
| <b>Figure S12.</b> The <sup>1</sup> H-NMR spectrum of arthone C ( <b>3</b> ) in DMSO- <i>d</i> <sub>6</sub>                 | <b>P8</b>  |
| <b>Figure S13.</b> The <sup>13</sup> C-NMR spectrum of arthone C ( <b>3</b> ) in DMSO- <i>d</i> <sub>6</sub>                | <b>P9</b>  |
| <b>Figure S14.</b> The HSQC spectrum of arthone C ( <b>3</b> ) in DMSO- <i>d</i> <sub>6</sub>                               | <b>P9</b>  |
| <b>Figure S15.</b> The HMBC spectrum of arthone C ( <b>3</b> ) in DMSO- <i>d</i> <sub>6</sub>                               | <b>P10</b> |
| <b>Figure S16.</b> The (+)-HR-ESIMS spectrum of arthone C ( <b>3</b> )                                                      | <b>P10</b> |
| <b>Figure S17.</b> The <sup>1</sup> H-NMR spectrum of arthone D ( <b>4</b> ) in DMSO- <i>d</i> <sub>6</sub>                 | <b>P11</b> |

|                                                                                                                                          |            |
|------------------------------------------------------------------------------------------------------------------------------------------|------------|
| <b>Figure S18.</b> The $^{13}\text{C}$ -NMR spectrum of arthone D ( <b>4</b> ) in $\text{DMSO-}d_6$                                      | <b>P11</b> |
| <b>Figure S19.</b> The HSQC spectrum of arthone D ( <b>4</b> ) in $\text{DMSO-}d_6$                                                      | <b>P12</b> |
| <b>Figure S20.</b> The HMBC spectrum of arthone D ( <b>4</b> ) in $\text{DMSO-}d_6$                                                      | <b>P12</b> |
| <b>Figure S21.</b> The (+)-HR-ESIMS spectrum of arthone D ( <b>4</b> )                                                                   | <b>P13</b> |
| <b>Figure S22.</b> The $^1\text{H}$ -NMR spectrum of arthone E ( <b>5</b> ) in $\text{DMSO-}d_6$                                         | <b>P13</b> |
| <b>Figure S23.</b> The $^{13}\text{C}$ -NMR spectrum of arthone E ( <b>5</b> ) in $\text{DMSO-}d_6$                                      | <b>P14</b> |
| <b>Figure S24.</b> The HSQC spectrum of arthone E ( <b>5</b> ) in $\text{DMSO-}d_6$                                                      | <b>P14</b> |
| <b>Figure S25.</b> The $^1\text{H}$ - $^1\text{H}$ COSY spectrum of arthone E ( <b>5</b> ) in $\text{DMSO-}d_6$                          | <b>P15</b> |
| <b>Figure S26.</b> The HMBC spectrum of arthone E ( <b>5</b> ) in $\text{DMSO-}d_6$                                                      | <b>P15</b> |
| <b>Figure S27.</b> The (+)-HR-ESIMS spectrum of arthone E ( <b>5</b> )                                                                   | <b>P16</b> |
| <b>Figure S28.</b> The $^1\text{H}$ -NMR spectrum of ( <i>R</i> )-MTPA ester of arthone B ( <b>2</b> ) in $\text{CDCl}_3$                | <b>P16</b> |
| <b>Figure S29.</b> The $^1\text{H}$ - $^1\text{H}$ COSY spectrum of ( <i>R</i> )-MTPA ester of arthone B ( <b>2</b> ) in $\text{CDCl}_3$ | <b>P17</b> |
| <b>Figure S30.</b> The $^1\text{H}$ -NMR spectrum of ( <i>S</i> )-MTPA ester of arthone B ( <b>2</b> ) in $\text{CDCl}_3$                | <b>P17</b> |
| <b>Figure S31.</b> Experimental and theoretical ECD spectra for <b>5</b>                                                                 | <b>P18</b> |

**Figure S1.** The  $^1\text{H}$ -NMR spectrum of arthone A (**1**) in  $\text{DMSO}-d_6$

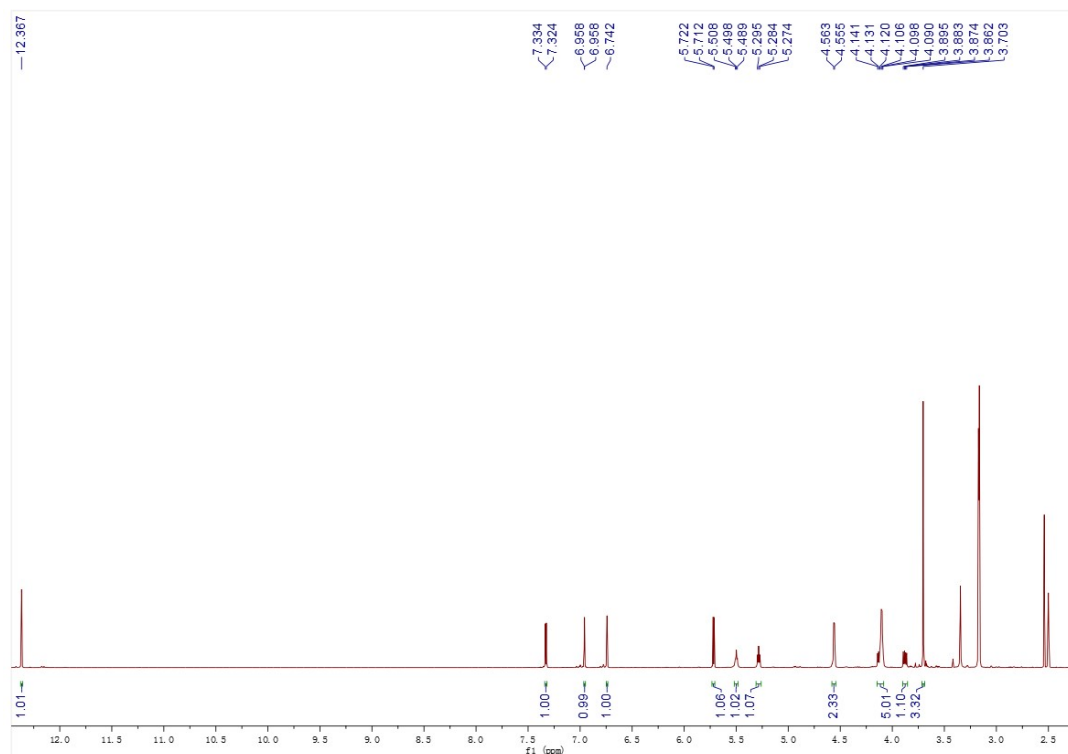

**Figure S2.** The  $^{13}\text{C}$ -NMR spectrum of arthone A (**1**) in  $\text{DMSO}-d_6$

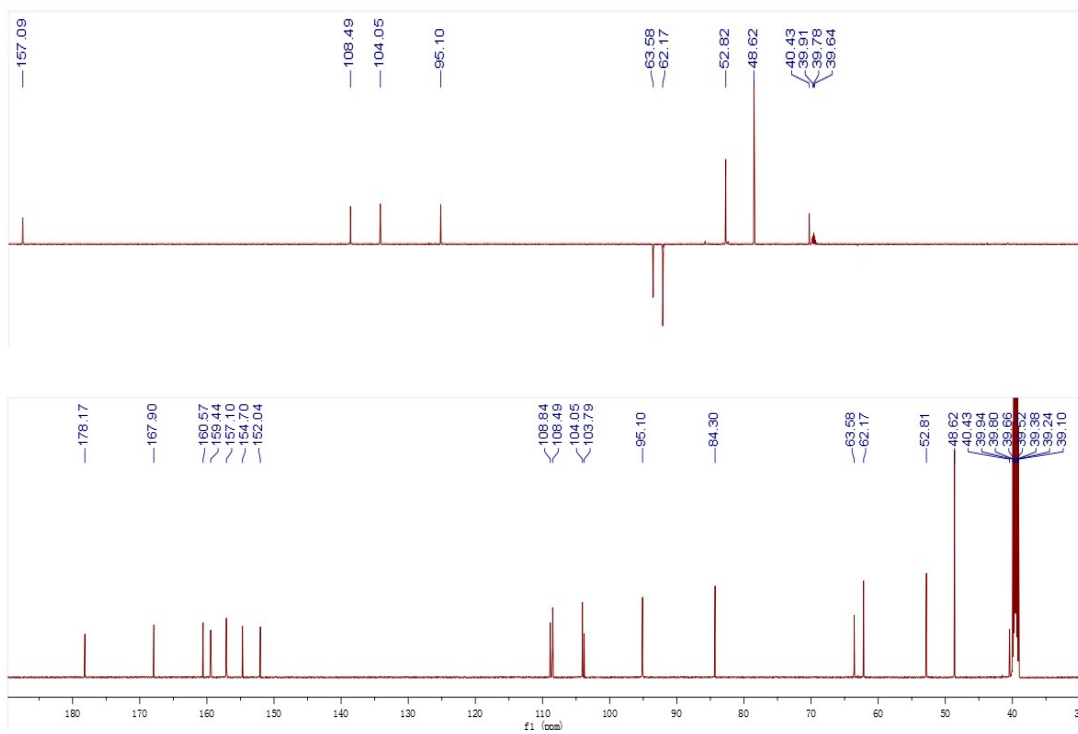

**Figure S3.** The HSQC spectrum of arthone A (**1**) in DMSO- $d_6$

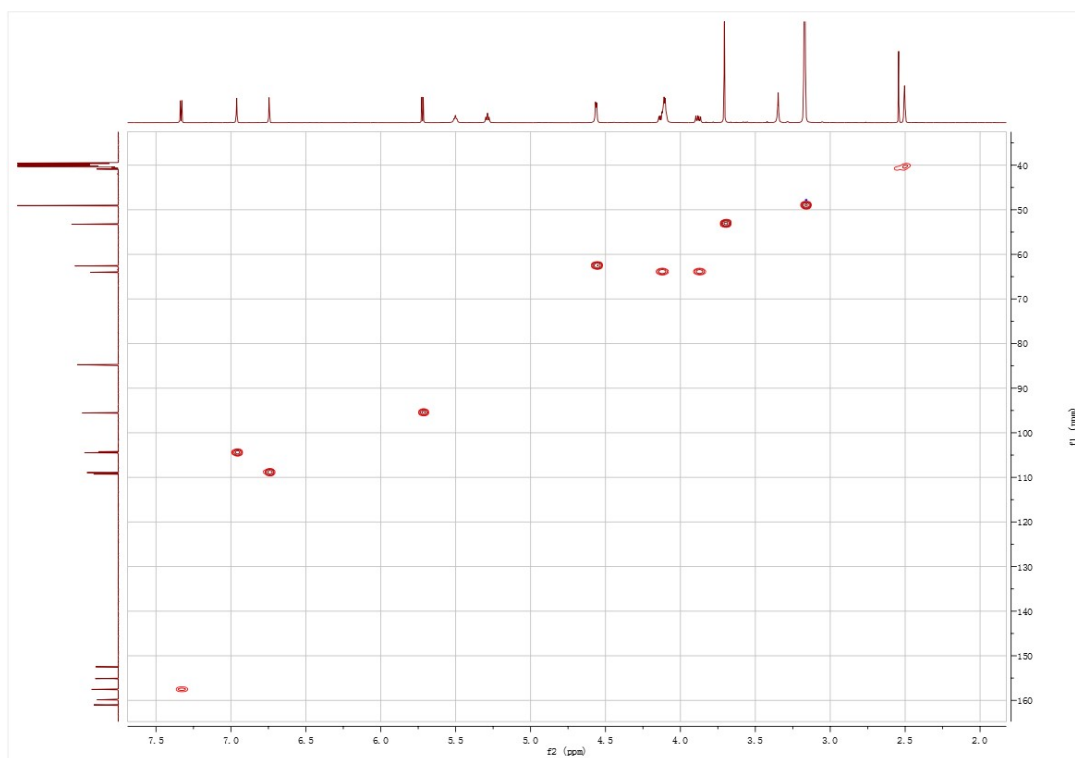

**Figure S4.** The HMBC spectrum of arthone A (**1**) in DMSO- $d_6$

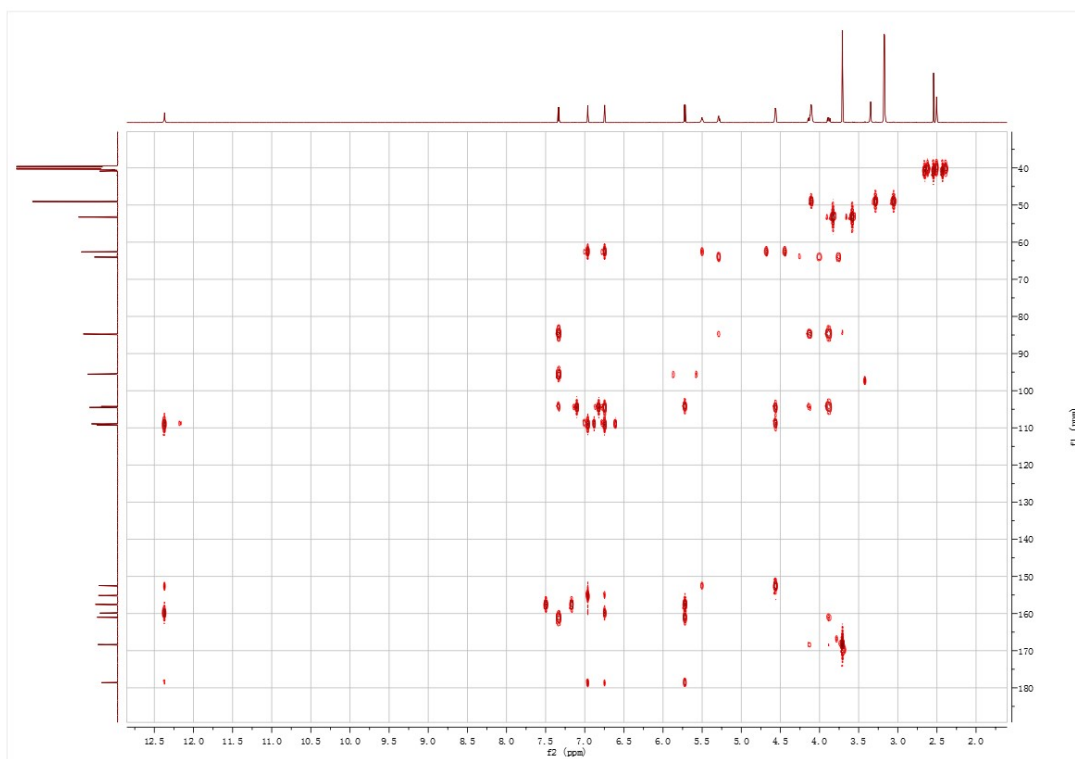

**Figure S5.** The (–)-HR-ESIMS spectrum of arthone A (**1**)

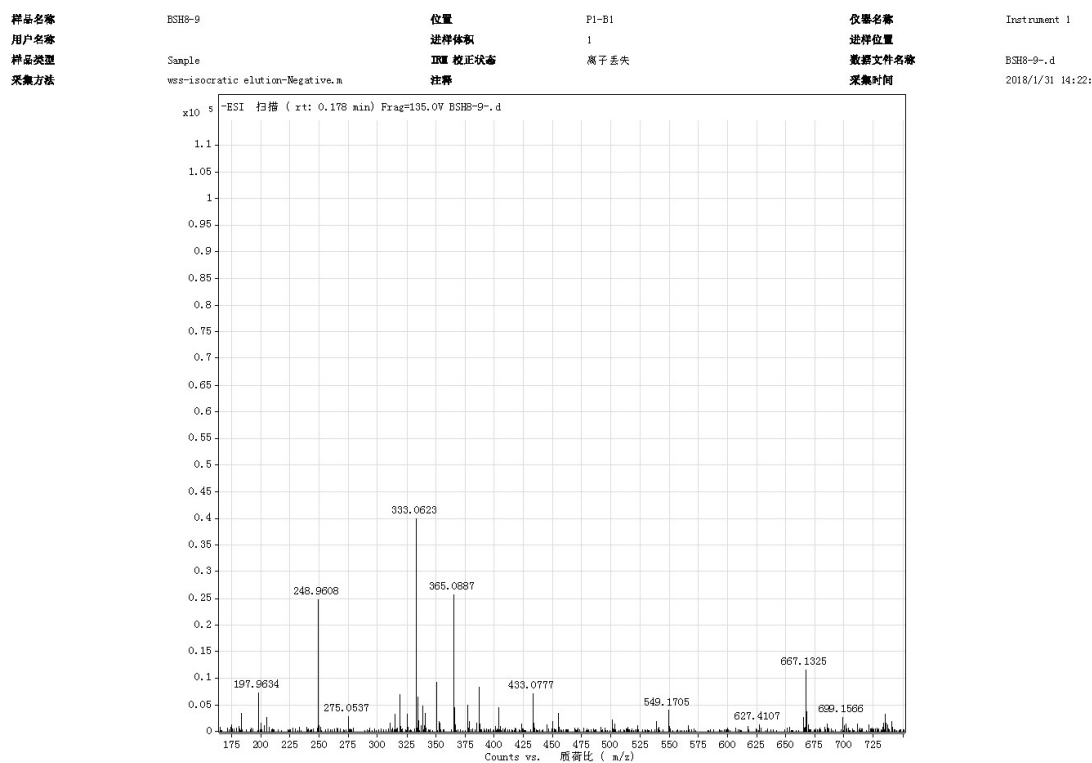

**Figure S6.** The  $^1\text{H}$ -NMR spectrum of arthone B (**2**) in  $\text{DMSO}-d_6$

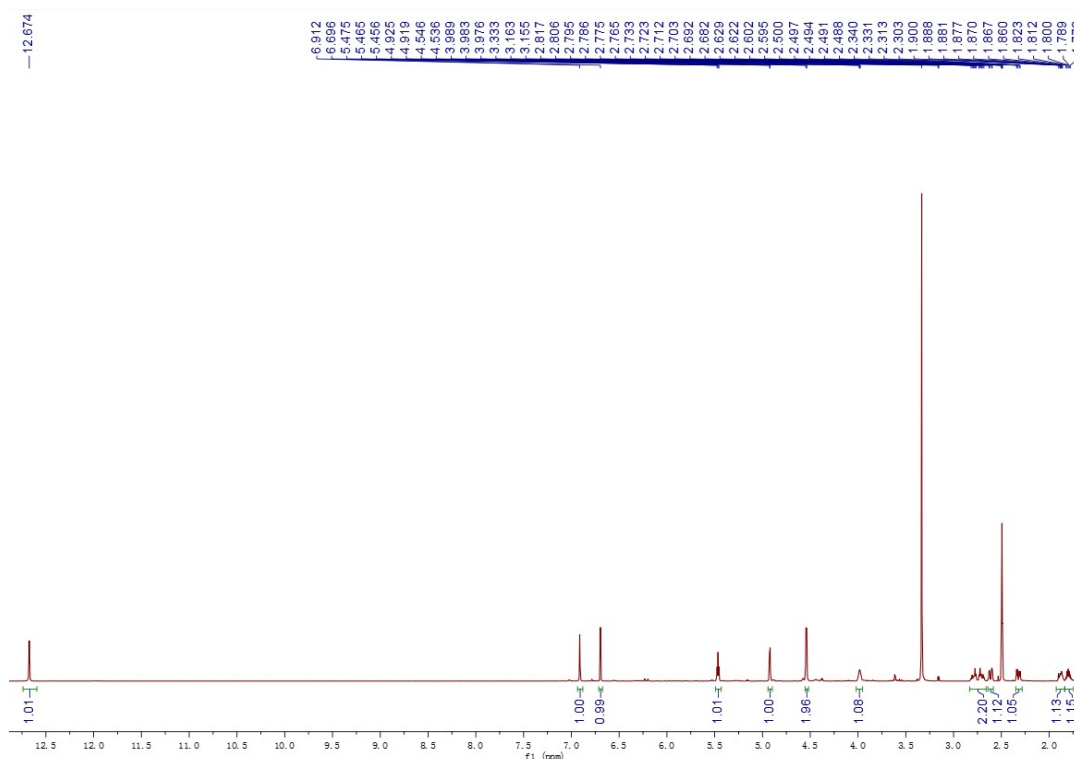

**Figure S7.** The  $^{13}\text{C}$ -NMR spectrum of arthone B (**2**) in  $\text{DMSO-}d_6$

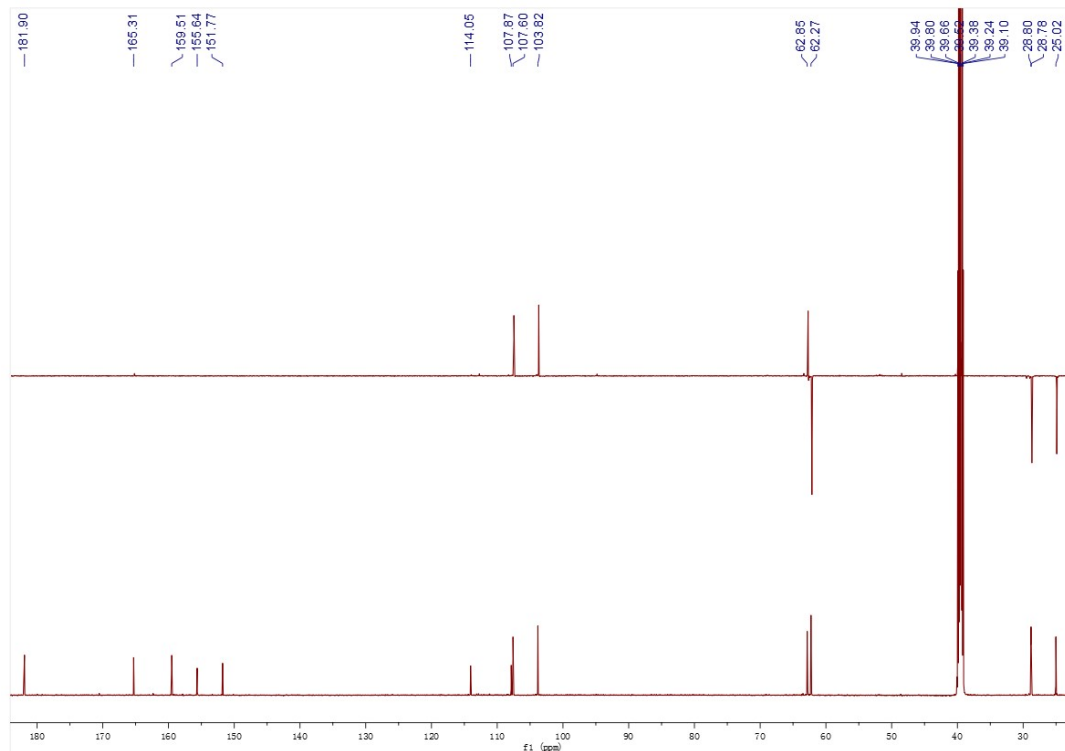

**Figure S8.** The HSQC spectrum of arthone B (**2**) in  $\text{DMSO-}d_6$

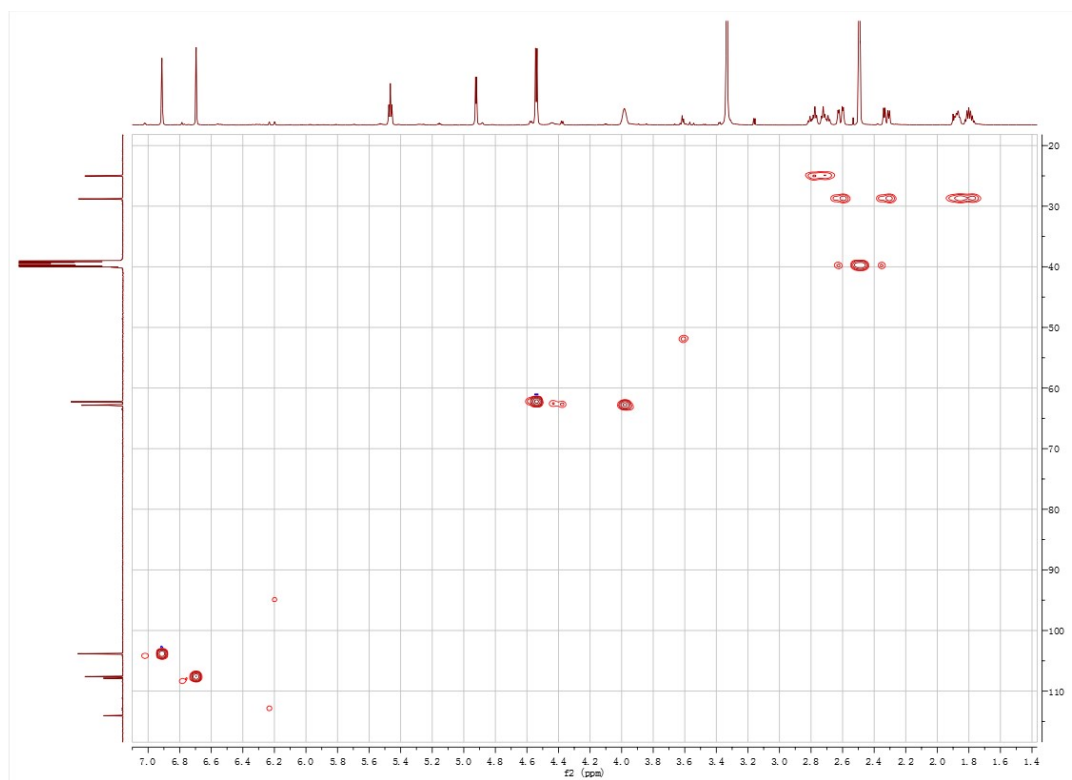

**Figure S9.** The  $^1\text{H}$ - $^1\text{H}$  COSY spectrum of arthone B (**2**) in  $\text{DMSO}-d_6$

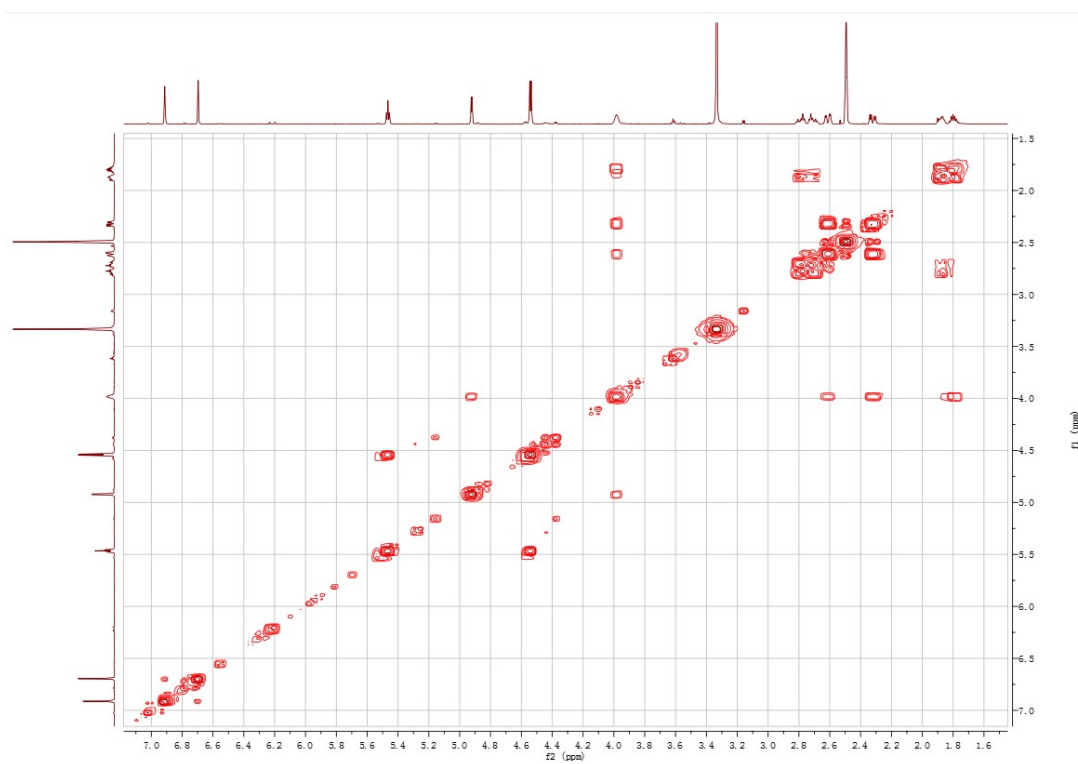

**Figure S10.** The HMBC spectrum of arthone B (**2**) in  $\text{DMSO}-d_6$

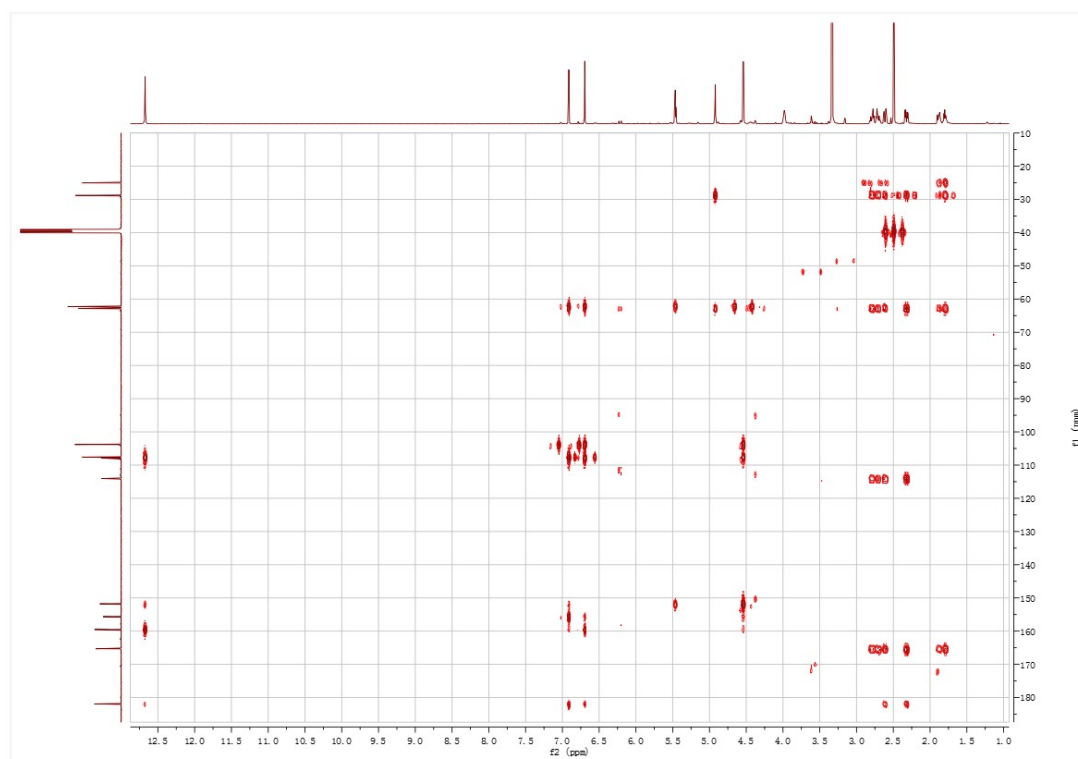

**Figure S11.** The (+)-HR-ESIMS spectrum of arthone B (2)

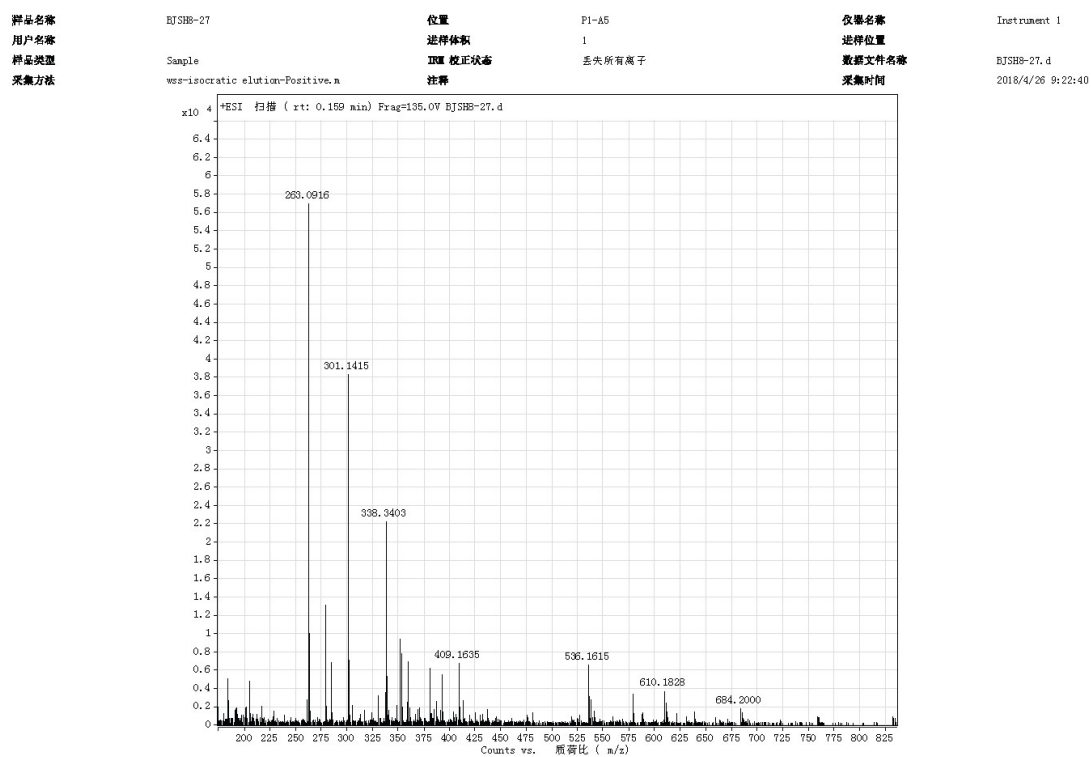

**Figure S12.** The  $^1\text{H}$ -NMR spectrum of arthone C (3) in  $\text{DMSO}-d_6$

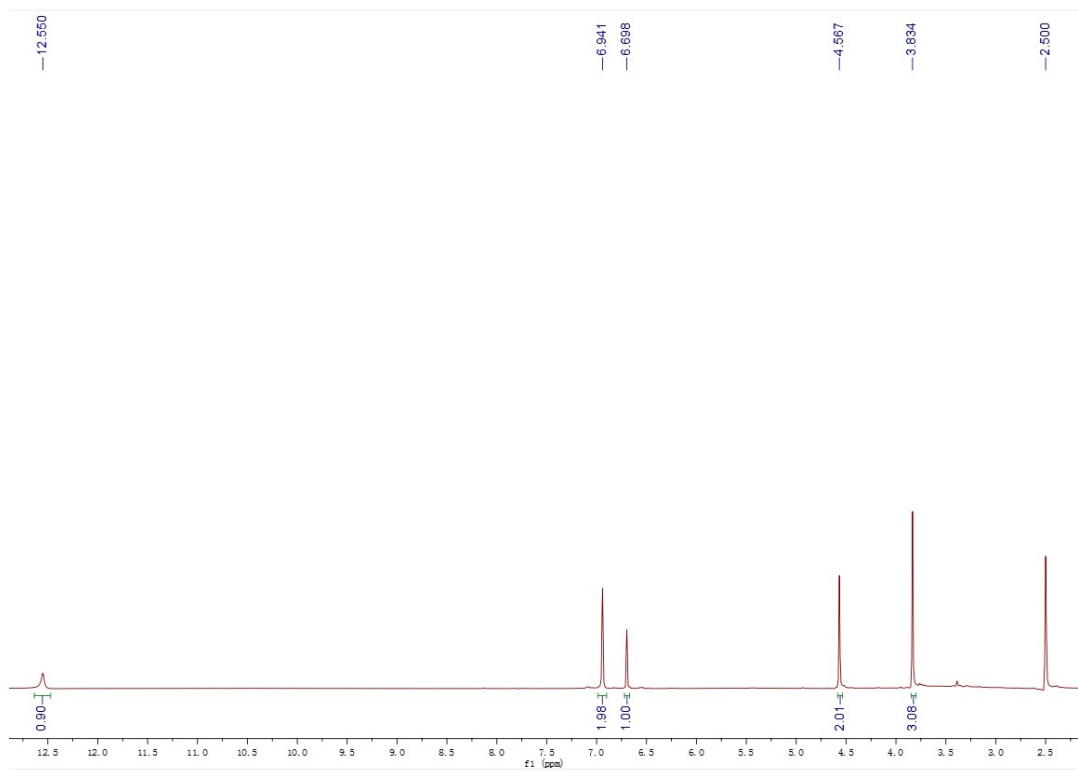

**Figure S13.** The  $^{13}\text{C}$ -NMR spectrum of arthone C (**3**) in  $\text{DMSO-}d_6$

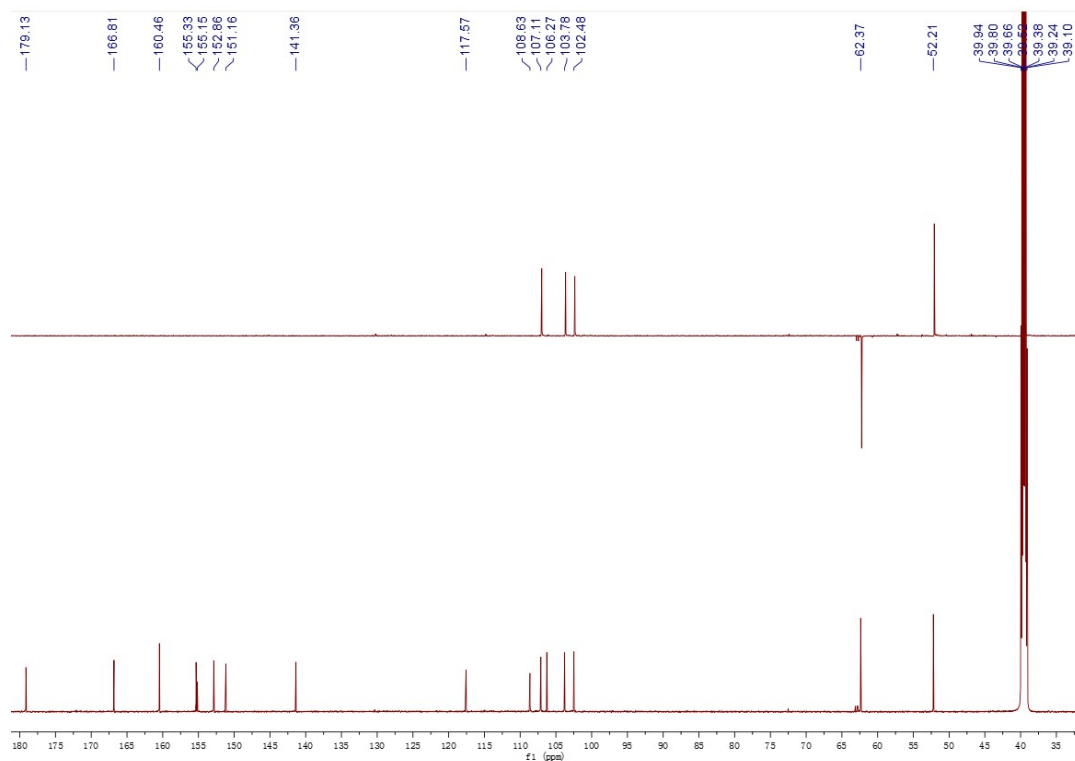

**Figure S14.** The HSQC spectrum of arthone C (**3**) in  $\text{DMSO-}d_6$

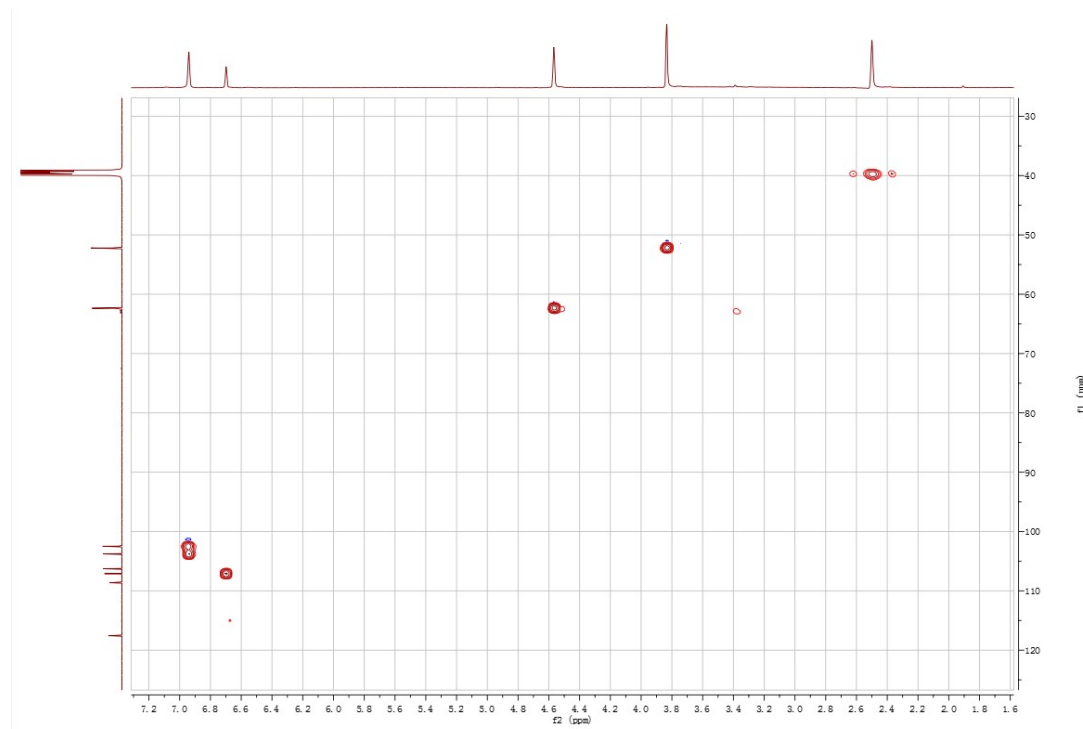

**Figure S15.** The HMBC spectrum of arthone C (**3**) in DMSO- $d_6$

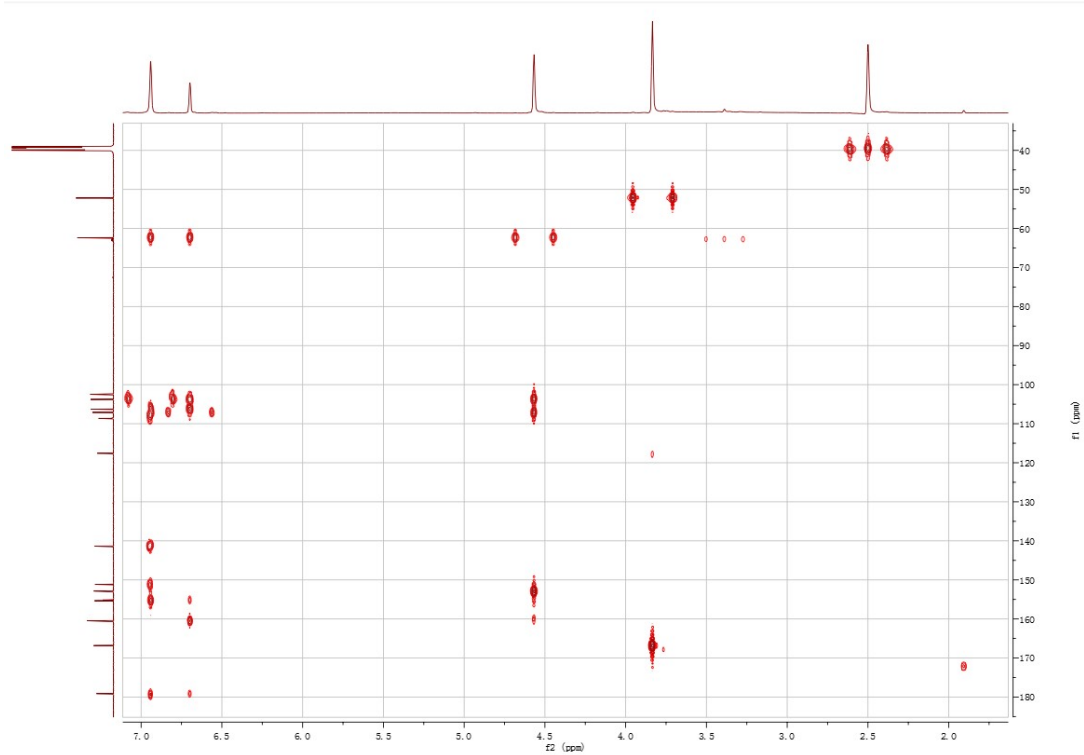

**Figure S16.** The (+)-HR-ESIMS spectrum of arthone C (**3**)

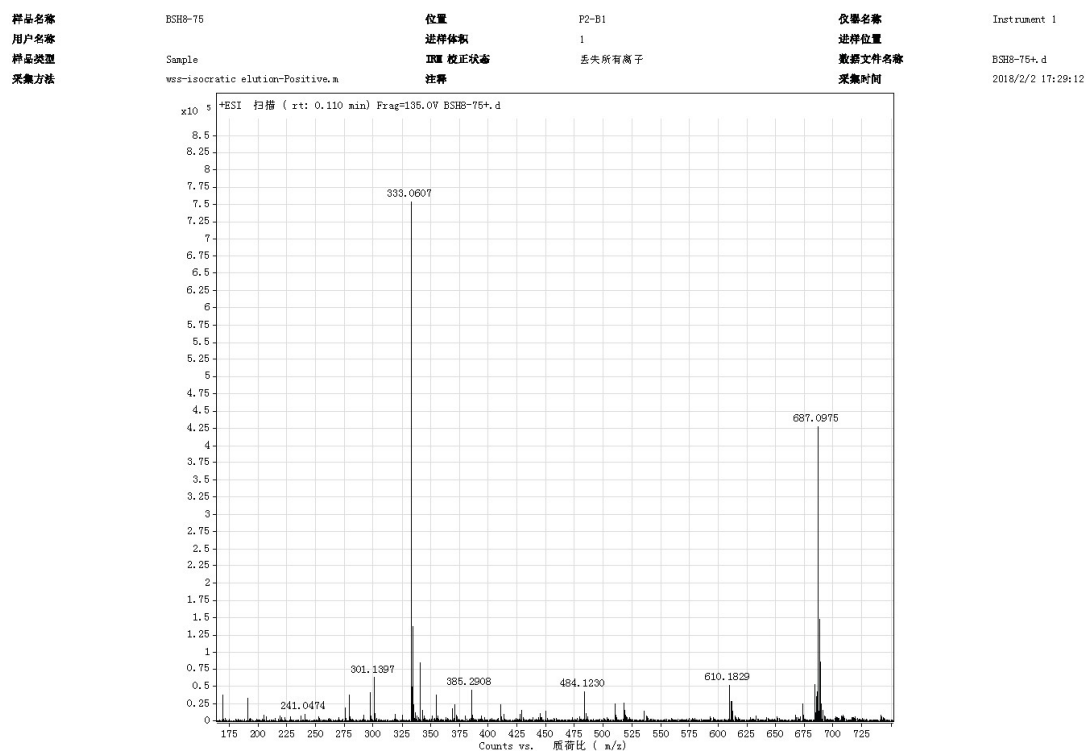

**Figure S17.** The  $^1\text{H}$ -NMR spectrum of arthone D (**4**) in  $\text{DMSO}-d_6$

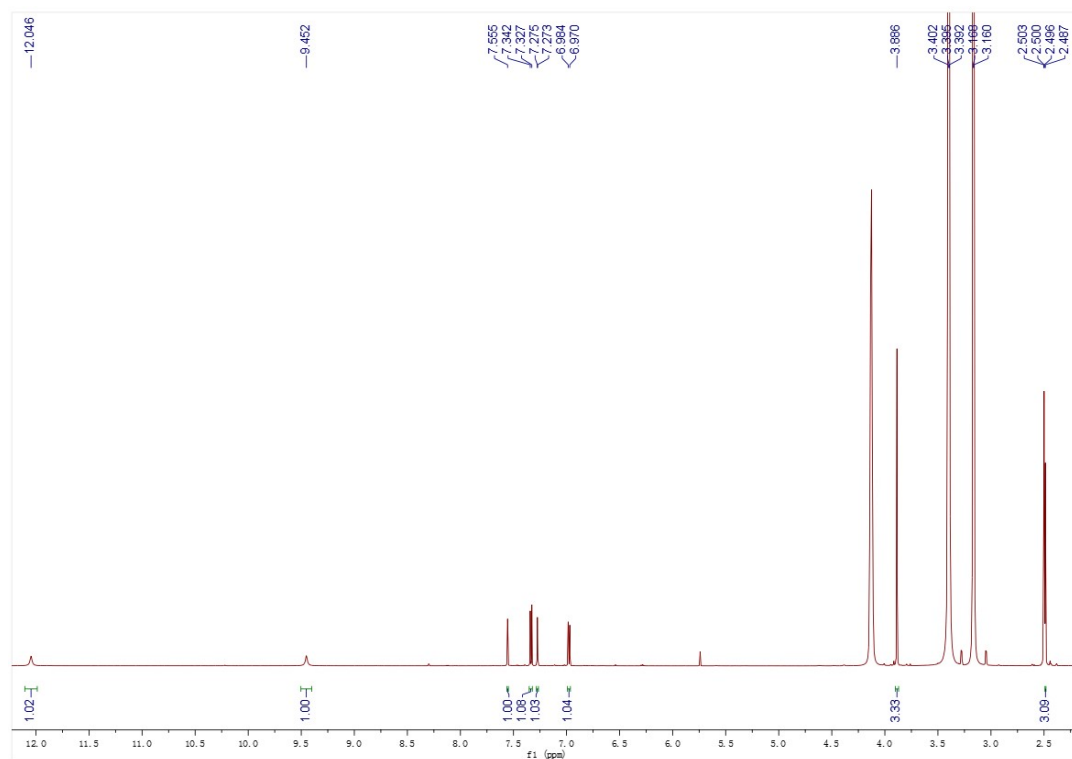

**Figure S18.** The  $^{13}\text{C}$ -NMR spectrum of arthone D (**4**) in  $\text{DMSO}-d_6$

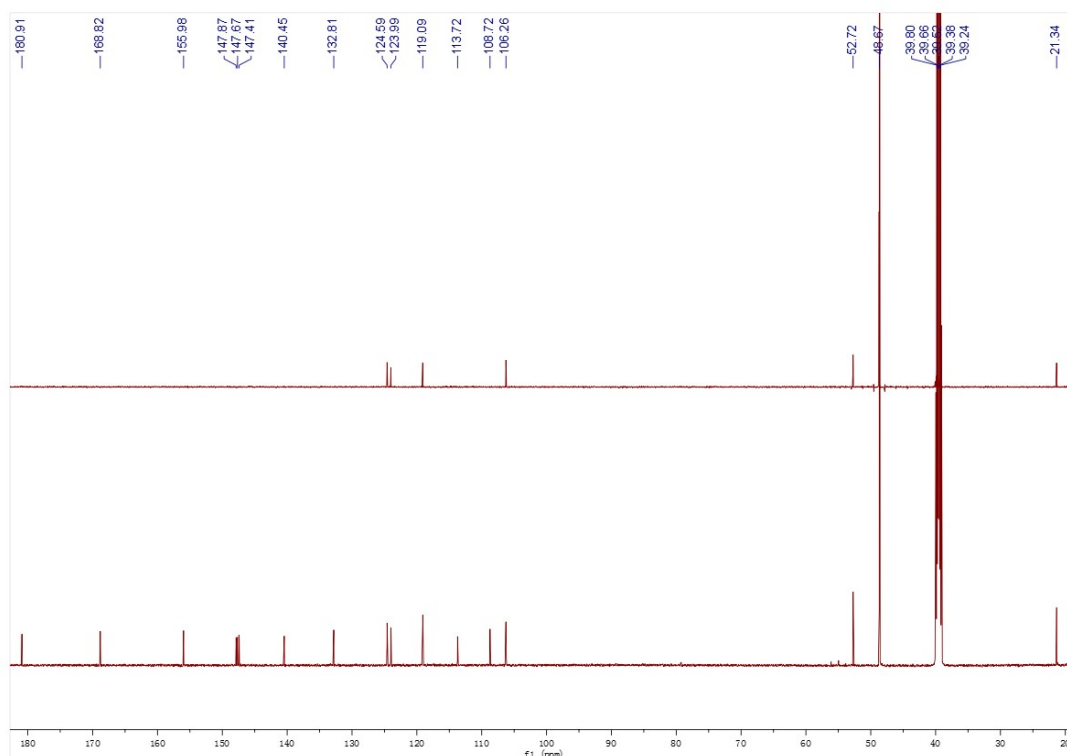

**Figure S19.** The HSQC spectrum of arthone D (**4**) in DMSO- $d_6$

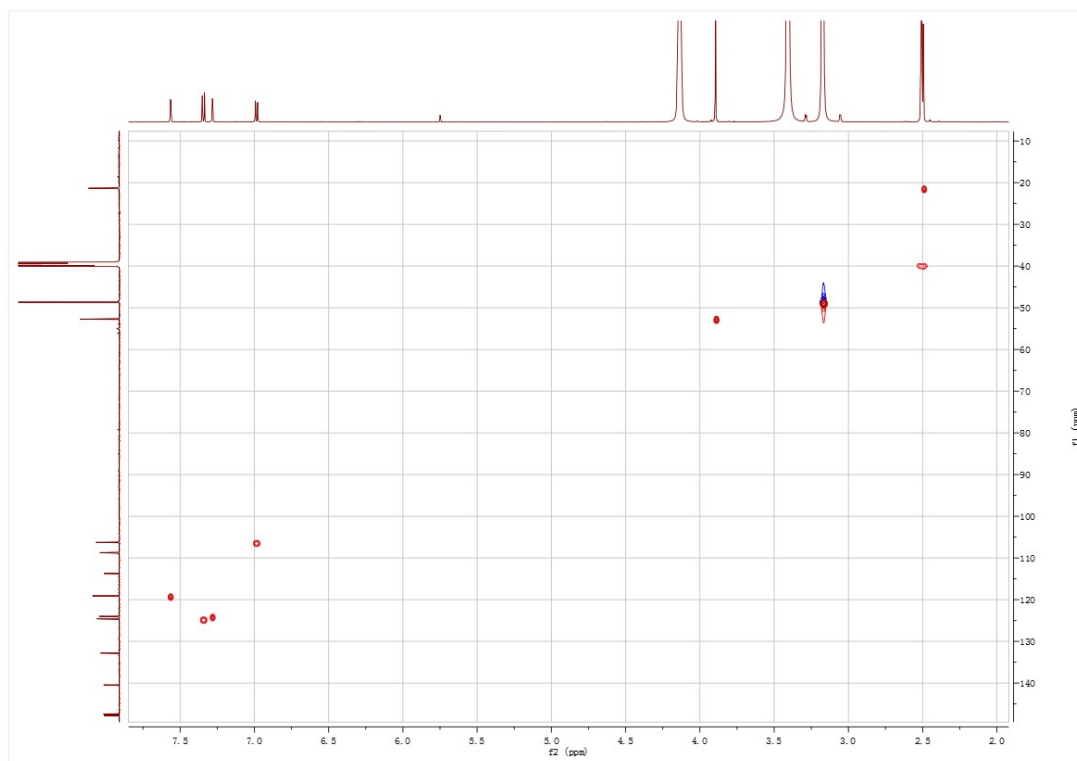

**Figure S20.** The HMBC spectrum of arthone D (**4**) in DMSO- $d_6$

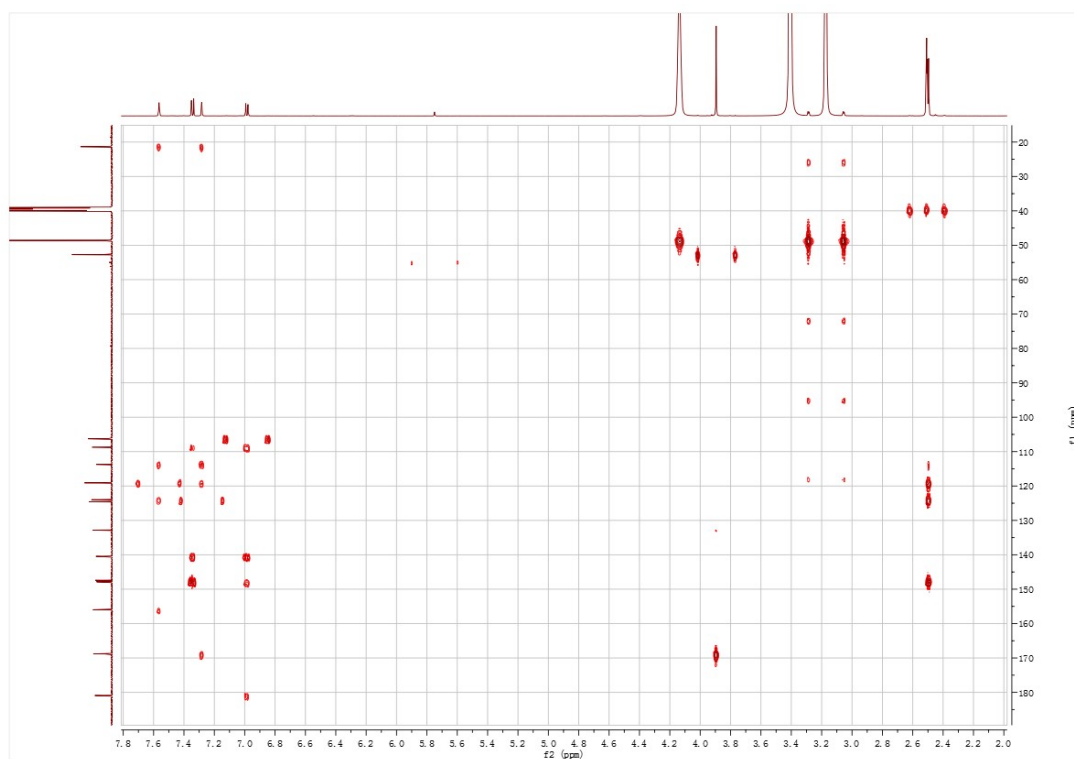

**Figure S21.** The (+)-HR-ESIMS spectrum of arthone D (**4**)

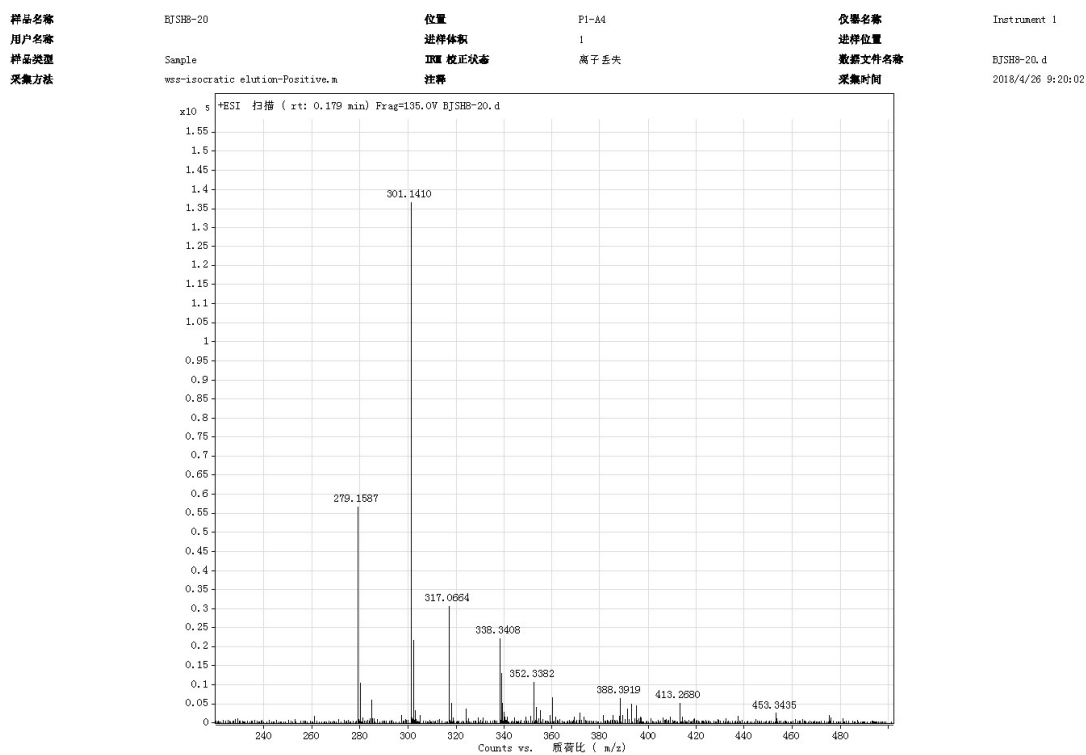

**Figure S22.** The  $^1\text{H}$ -NMR spectrum of arthone E (**5**) in  $\text{DMSO}-d_6$

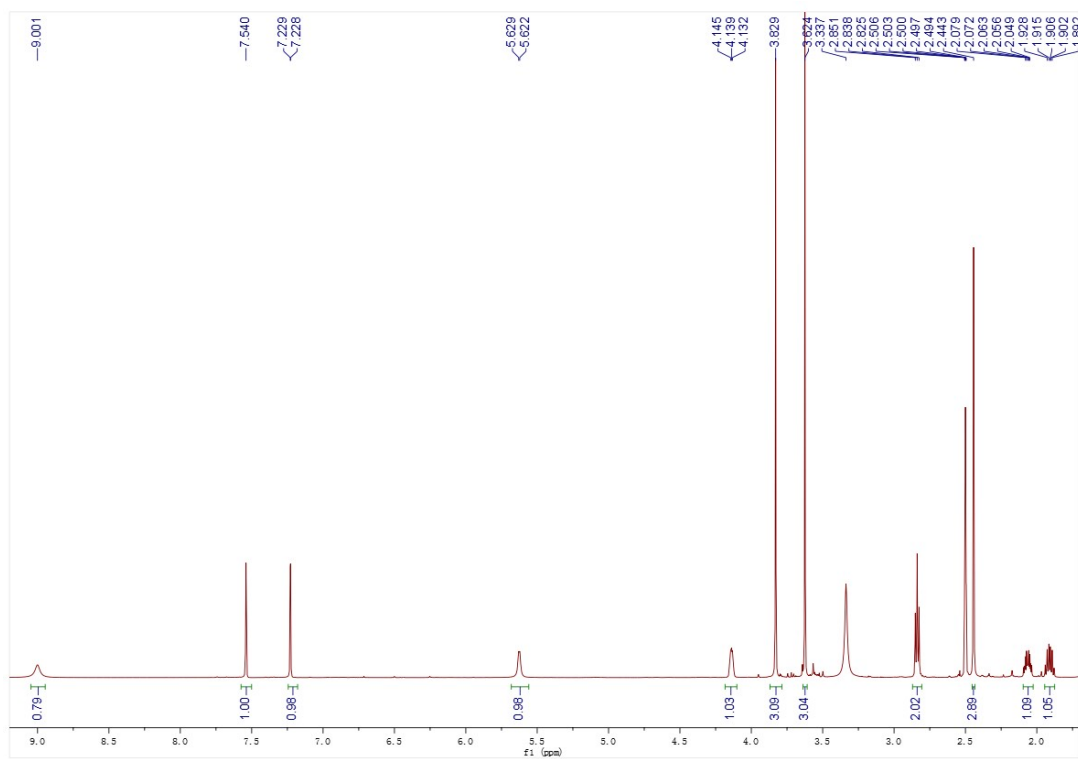

**Figure S23.** The  $^{13}\text{C}$ -NMR spectrum of arthone E (**5**) in  $\text{DMSO}-d_6$

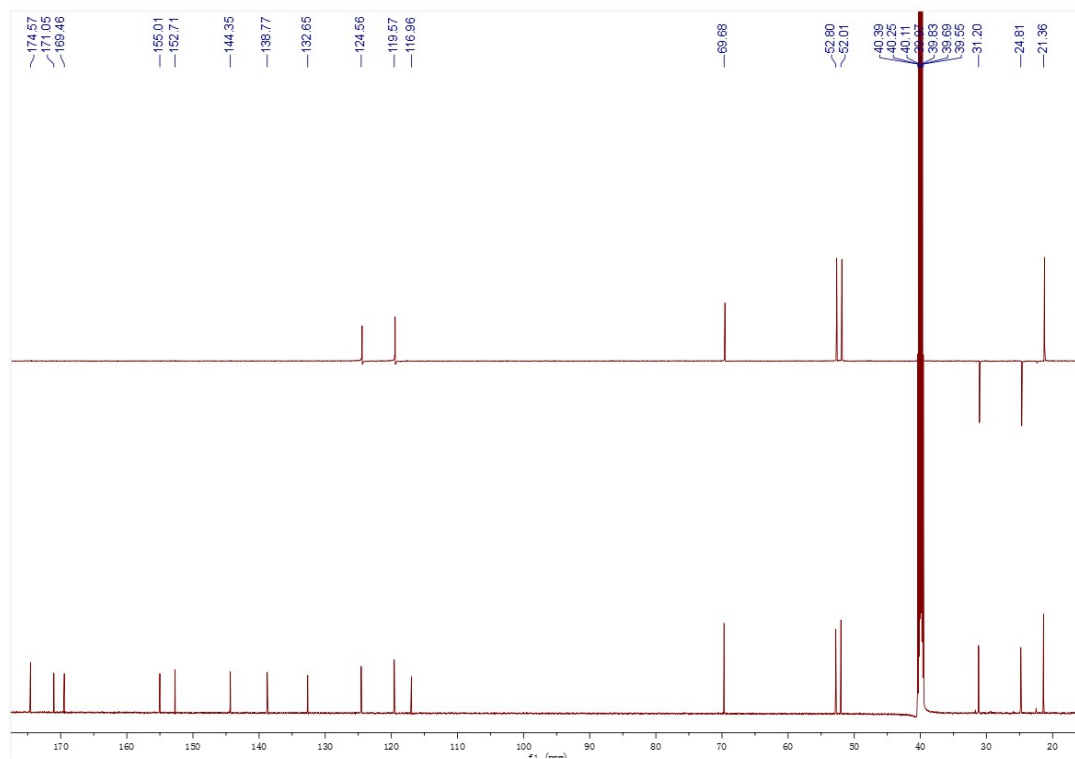

**Figure S24.** The HSQC spectrum of arthone E (**5**) in  $\text{DMSO}-d_6$

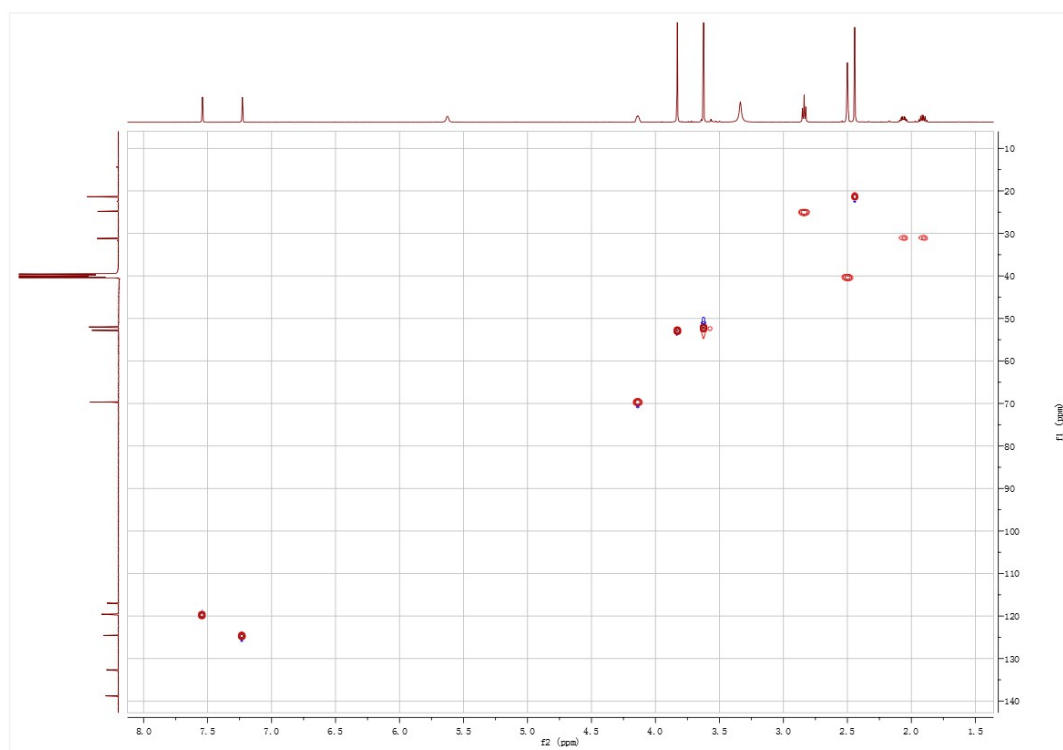

**Figure S25.** The  $^1\text{H}$ - $^1\text{H}$  COSY spectrum of arthone E (**5**) in  $\text{DMSO}-d_6$

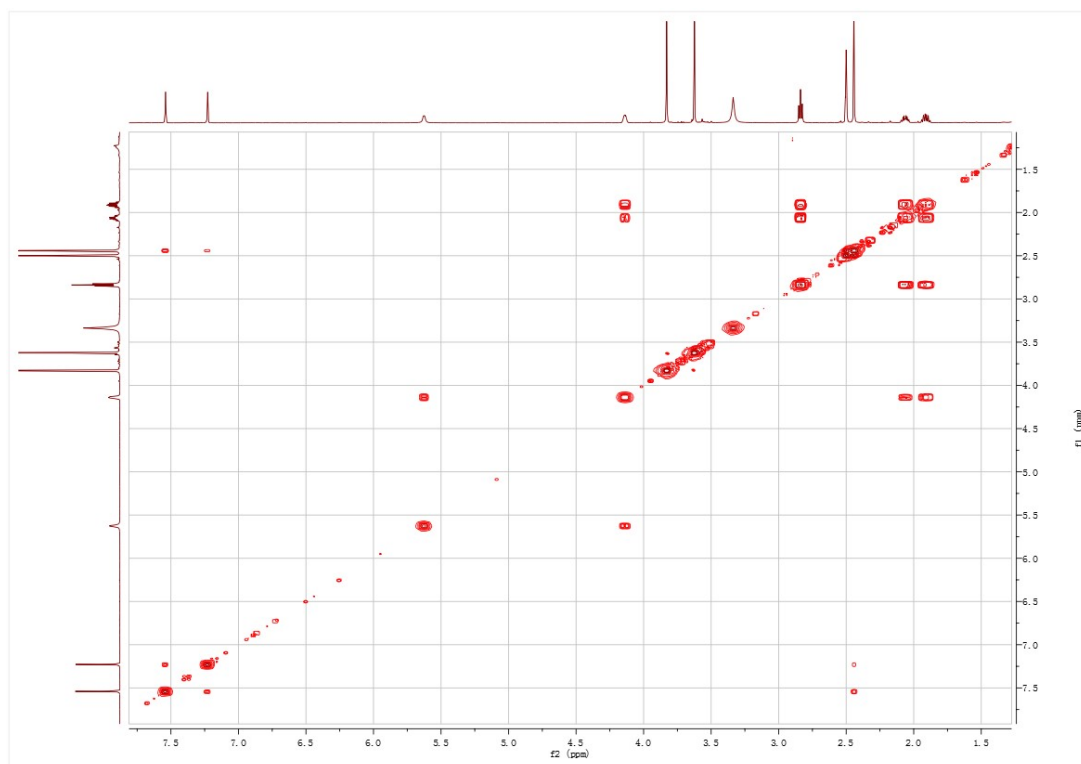

**Figure S26.** The HMBC spectrum of arthone E (**5**) in  $\text{DMSO}-d_6$

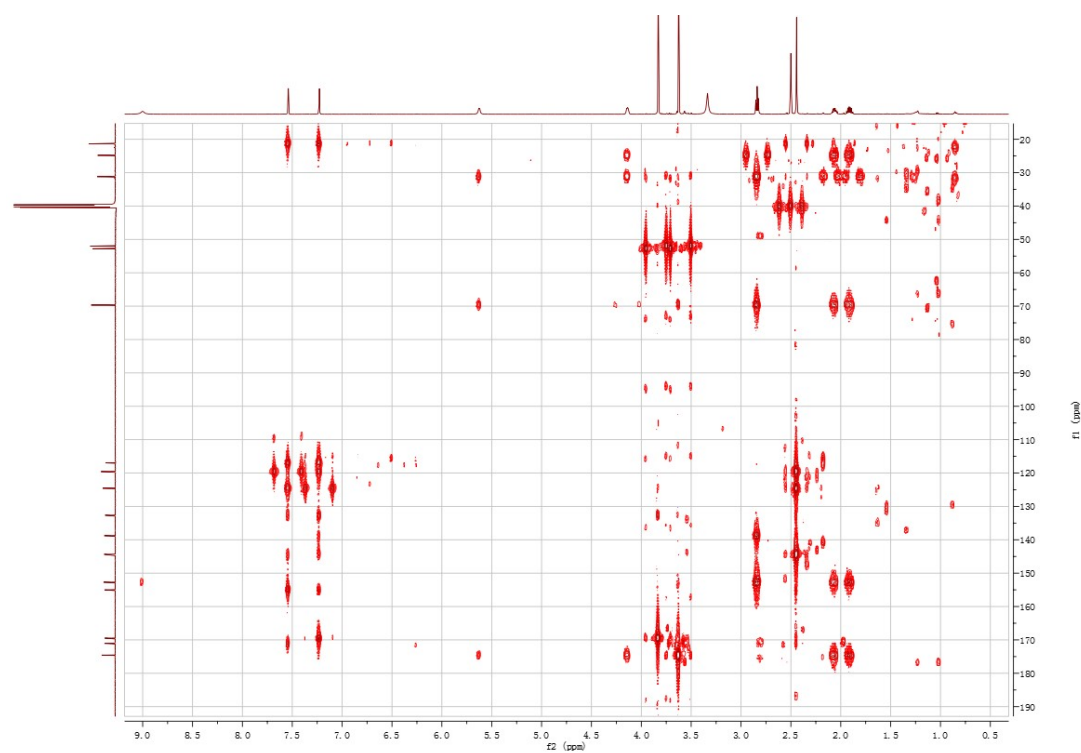

**Figure S27.** The (+)-HR-ESIMS spectrum of arthone E (**5**)

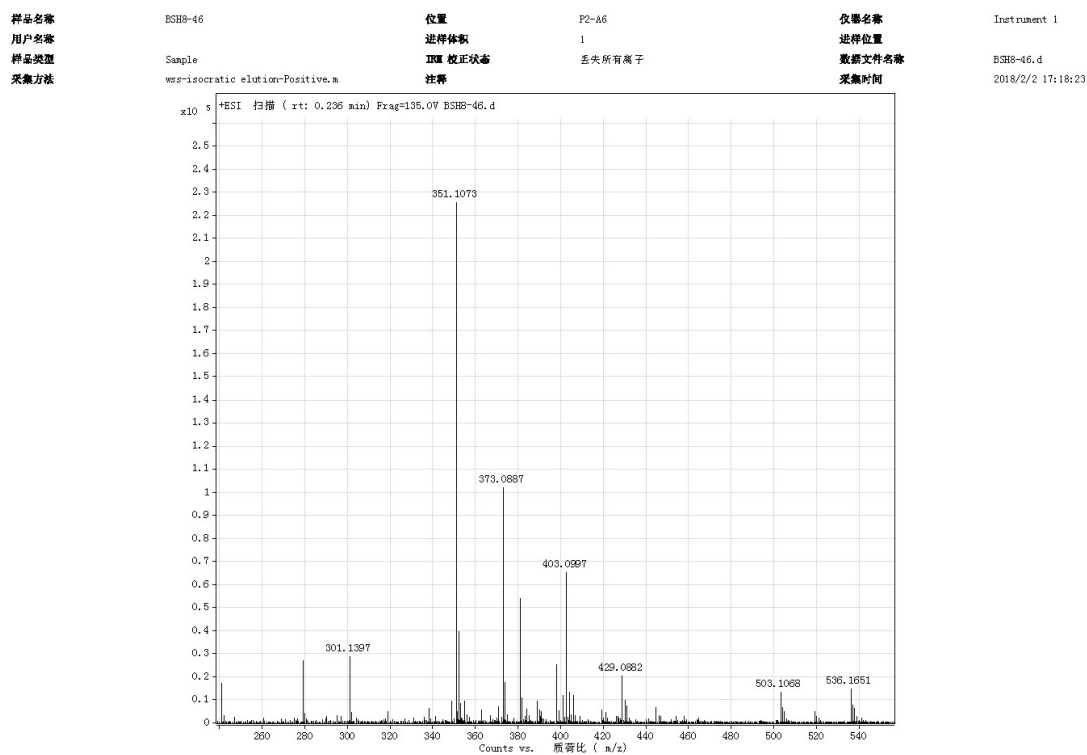

**Figure S28.** The  $^1\text{H}$ -NMR spectrum of (*R*)-MTPA ester of arthone B (**2**) in  $\text{CDCl}_3$

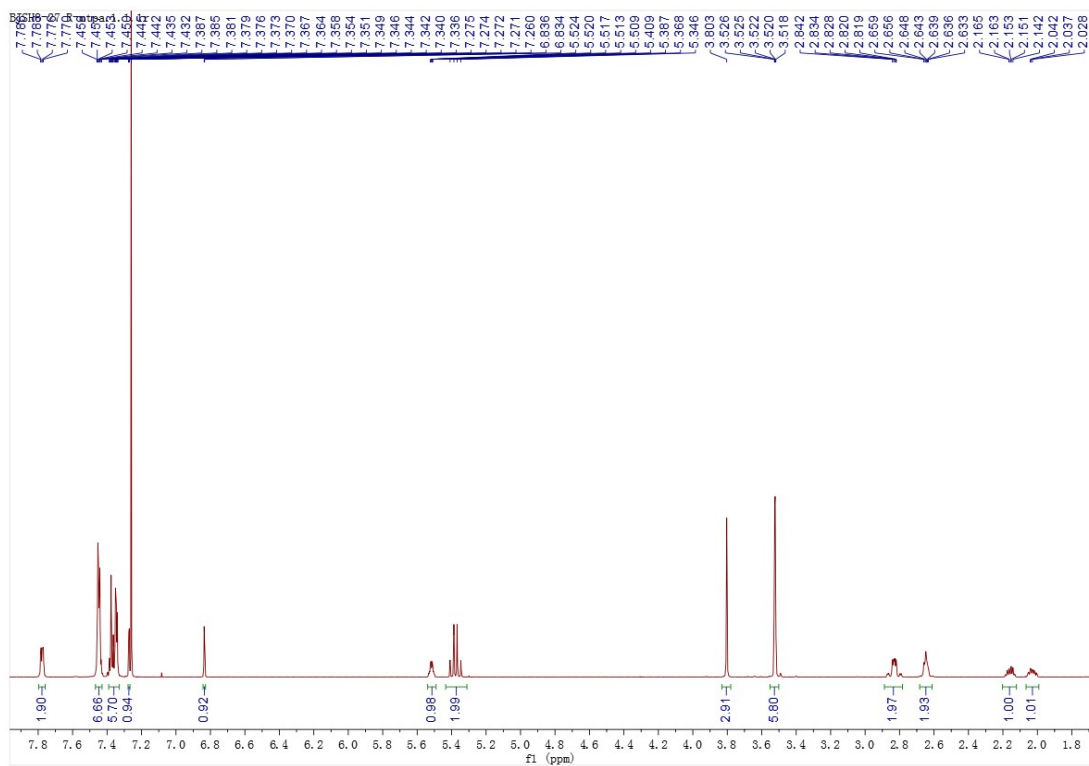

**Figure S29.** The  $^1\text{H}$ - $^1\text{H}$  COSY spectrum of (*R*)-MTPA ester of arthone B (**2**) in  $\text{CDCl}_3$

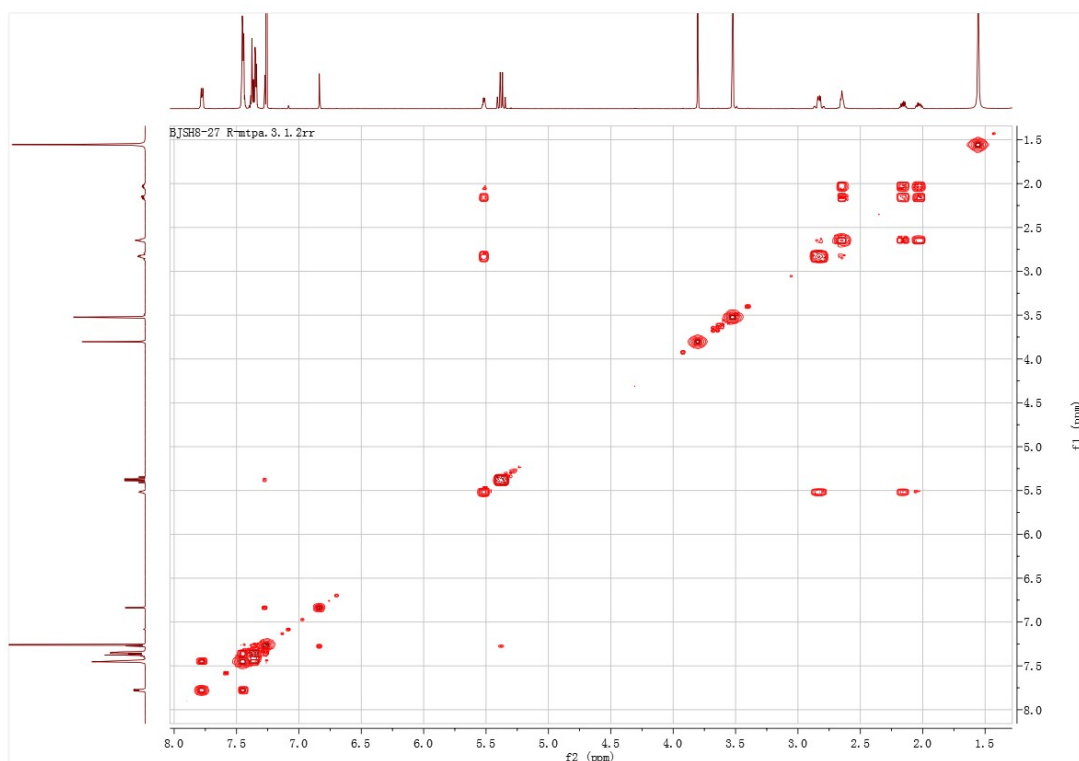

**Figure S30.** The  $^1\text{H}$ -NMR spectrum of (*S*)-MTPA ester of arthone B (**2**) in  $\text{CDCl}_3$

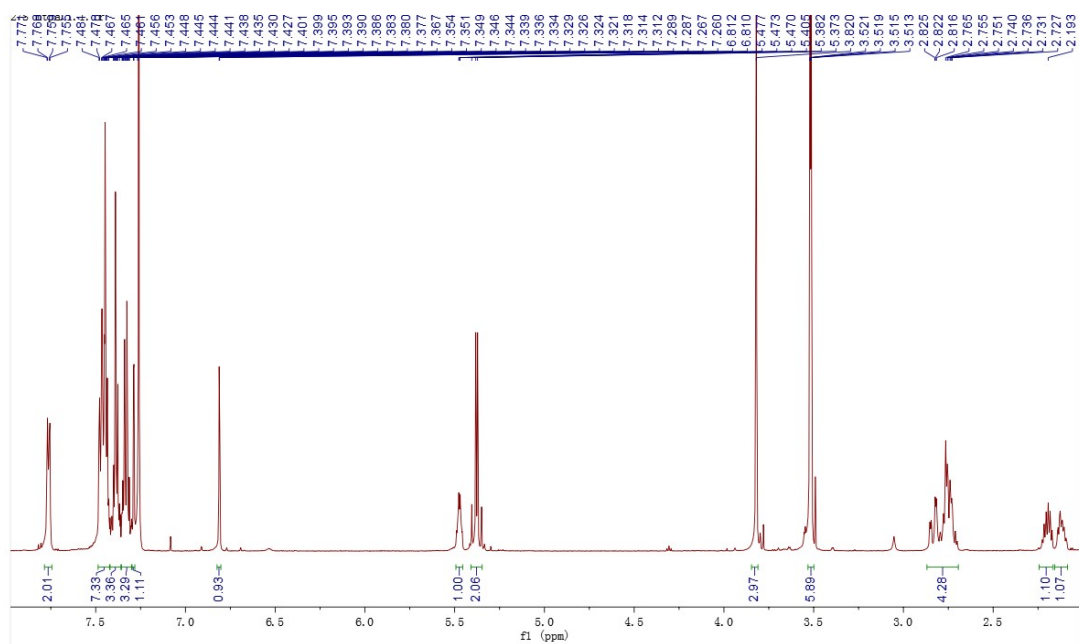

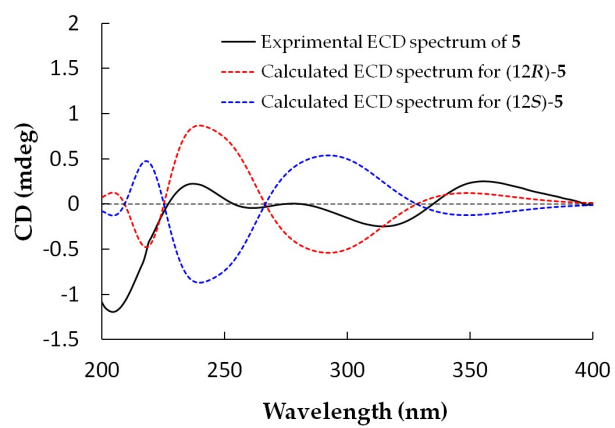

**Figure S31.** Experimental and theoretical ECD spectra for **5**
